# Supplementary material for: Distinct horizontal gene transfer potential of extracellular vesicles versus viral-like particles in marine habitats
Source: Research Square preprint supplement (doi:10.21203/rs.3.rs-4633115/v1), 2024-07-18
Supplement: Supplementary file 1 [file 6aa38dbb0797f471b4cc8a42.xlsx]

## Sheet: TableS2
Supplementary Table 2. KEGG orthologs found exclusively in one nanoparticle fraction. Orthologs were identified using eggNOGmapper (see Methods). Only orthologs found more than once in the total dataset are shown.
KO	Description	Count (EV-enriched)	Count (VLP-enriched)
K07557	tgtA2, arcS; archaeosine synthase alpha-subunit [EC:2.6.1.97 2.6.1.-]	135	0
K12194	CHMP4A_B, SNF7, VPS32A_B; charged multivesicular body protein 4A/B	119	0
K12198	CHMP5, VPS60; charged multivesicular body protein 5	119	0
K01275	CTSC; cathepsin C [EC:3.4.14.1]	88	0
K06129	LYPLA3; lysophospholipase III [EC:3.1.1.5]	88	0
K10624	RBBP6; E3 ubiquitin-protein ligase RBBP6 [EC:2.3.2.27]	85	0
K12351	SMPD2; sphingomyelin phosphodiesterase 2 [EC:3.1.4.12]	83	0
K03235	EF3, TEF3; elongation factor 3	77	0
K16281	RHA1; RING-H2 zinc finger protein RHA1	77	0
K16253	NRPD7, NRPE7; DNA-directed RNA polymerase IV and V subunit 7	65	0
K25450	TCTE1, DRC5; dynein regulatory complex subunit 5	56	0
K01375	CTSL2, CTSV; cathepsin V [EC:3.4.22.43]	55	0
K09599	CTSP; cathepsin P [EC:3.4.22.-]	55	0
K09600	CTSM; cathepsin M [EC:3.4.22.-]	55	0
K09601	CTSR; cathepsin R [EC:3.4.22.-]	55	0
K12042	TNNC2; troponin C, skeletal muscle	52	0
K02183	CALM; calmodulin	50	0
K02977	RP-S27Ae, RPS27A, UBA80; ubiquitin-small subunit ribosomal protein S27Ae	47	0
K00465	CCD1; carotenoid 9,10(9',10')-cleavage dioxygenase 1 [EC:1.13.11.-]	41	0
K11159	K11159; carotenoid cleavage oxygenase [EC:1.13.11.-]	41	0
K15206	TFC7; transcription factor C subunit 7	41	0
K02013	ABC.FEV.A; iron complex transport system ATP-binding protein [EC:7.2.2.-]	38	0
K16291	erfK; L,D-transpeptidase ErfK/SrfK	38	0
K08073	PNKP; bifunctional polynucleotide phosphatase/kinase [EC:3.1.3.32 2.7.1.78]	36	0
K06130	LYPLA2; lysophospholipase II [EC:3.1.1.5]	35	0
K04097	HPGDS; prostaglandin-H2 D-isomerase / glutathione transferase [EC:5.3.99.2 2.5.1.18]	34	0
K05658	ABCB1, CD243; ATP-binding cassette, subfamily B (MDR/TAP), member 1 [EC:7.6.2.2]	34	0
K03301	TC.AAA; ATP:ADP antiporter, AAA family	33	0
K05939	aas; acyl-[acyl-carrier-protein]-phospholipid O-acyltransferase / long-chain-fatty-acid--[acyl-carrier-protein] ligase [EC:2.3.1.40 6.2.1.20]	32	0
K15371	GDH2; glutamate dehydrogenase [EC:1.4.1.2]	32	0
K02021	ABC.MR; putative ABC transport system ATP-binding protein	31	0
K01081	E3.1.3.5; 5'-nucleotidase [EC:3.1.3.5]	29	0
K12208	icmD, dotP; intracellular multiplication protein IcmD	29	0
K01119	cpdB; 2',3'-cyclic-nucleotide 2'-phosphodiesterase / 3'-nucleotidase [EC:3.1.4.16 3.1.3.6]	28	0
K16718	CNN; centrosomin	28	0
K10393	KIF2_24, MCAK; kinesin family member 2/24	27	0
K24427	SPON1; spondin-1	27	0
K06058	DTX; deltex [EC:2.3.2.27]	25	0
K10650	TRIM11; tripartite motif-containing protein 11 [EC:2.3.2.27]	25	0
K10668	RNF138; E3 ubiquitin-protein ligase RNF138 [EC:2.3.2.27]	23	0
K00294	E1.2.1.88; 1-pyrroline-5-carboxylate dehydrogenase [EC:1.2.1.88]	22	0
K01210	E3.2.1.58; glucan 1,3-beta-glucosidase [EC:3.2.1.58]	22	0
K03404	chlD, bchD; magnesium chelatase subunit D [EC:6.6.1.1]	22	0
K03654	recQ; ATP-dependent DNA helicase RecQ [EC:5.6.2.4]	22	0
K12308	bgaB, lacA; beta-galactosidase [EC:3.2.1.23]	22	0
K13346	PEX10; peroxin-10	22	0
K24475	ELSPBP1; epididymal sperm-binding protein 1	22	0
K05185	GABRE; gamma-aminobutyric acid receptor subunit epsilon	21	0
K07453	K07453; putative restriction endonuclease	21	0
K07890	RAB21; Ras-related protein Rab-21	21	0
K08856	STK16; serine/threonine kinase 16 [EC:2.7.11.1]	21	0
K08978	TC.BAT1; bacterial/archaeal transporter family protein	21	0
K09566	PPIG; peptidyl-prolyl isomerase G (cyclophilin G) [EC:5.2.1.8]	21	0
K10790	TREX1; three prime repair exonuclease 1 [EC:3.1.11.2]	21	0
K12218	icmP, trbA; intracellular multiplication protein IcmP	21	0
K12740	NKTR; NK-tumor recognition protein	21	0
K13047	TLL2; tolloid-like protein 2 [EC:3.4.24.-]	21	0
K04819	HTR3; 5-hydroxytryptamine receptor 3	20	0
K15326	TSEN54; tRNA-splicing endonuclease subunit Sen54	20	0
K16285	XERICO; RING/U-box domain-containing protein [EC:2.3.2.27]	20	0
K17785	IMMT, MIC60; MICOS complex subunit MIC60	20	0
K18573	ICP55; intermediate cleaving peptidase 55 [EC:3.4.11.26]	20	0
K07648	arcB; two-component system, OmpR family, aerobic respiration control sensor histidine kinase ArcB [EC:2.7.13.3]	19	0
K08956	AFG3; AFG3 family protein [EC:3.4.24.-]	19	0
K09506	DNAJA5; DnaJ homolog subfamily A member 5	19	0
K09516	RETSAT; all-trans-retinol 13,14-reductase [EC:1.3.99.23]	19	0
K09694	nodJ; lipooligosaccharide transport system permease protein	19	0
K11426	SMYD; [histone H3]-lysine4/36 N-trimethyltransferase SMYD [EC:2.1.1.354 2.1.1.357]	19	0
K00425	cydA; cytochrome bd ubiquinol oxidase subunit I [EC:7.1.1.7]	18	0
K01098	CET1; polynucleotide 5'-triphosphatase [EC:3.6.1.74]	18	0
K02492	hemA; glutamyl-tRNA reductase [EC:1.2.1.70]	18	0
K11857	USP47; ubiquitin carboxyl-terminal hydrolase 47 [EC:3.4.19.12]	18	0
K12209	icmE, dotG; intracellular multiplication protein IcmE	18	0
K16074	zntB; zinc transporter	18	0
K18342	OTUD6; OTU domain-containing protein 6 [EC:3.4.19.12]	18	0
K00426	cydB; cytochrome bd ubiquinol oxidase subunit II [EC:7.1.1.7]	17	0
K12206	icmB, dotO; intracellular multiplication protein IcmB [EC:7.2.4.8]	17	0
K13071	PAO, ACD1; pheophorbide a oxygenase [EC:1.14.15.17]	17	0
K22212	mleA, mleS; malolactic enzyme	17	0
K24450	hmf, hmt; DNA-binding protein	17	0
K00441	frhB; coenzyme F420 hydrogenase subunit beta [EC:1.12.98.1]	16	0
K00912	lpxK; tetraacyldisaccharide 4'-kinase [EC:2.7.1.130]	16	0
K03972	pspE; phage shock protein E	16	0
K09015	sufD; Fe-S cluster assembly protein SufD	16	0
K23778	rcdA; TetR/AcrR family transcriptional regulator	16	0
K00336	nuoG; NADH-quinone oxidoreductase subunit G [EC:7.1.1.2]	15	0
K05297	rubB, alkT; rubredoxin---NAD+ reductase [EC:1.18.1.1]	15	0
K07645	qseC; two-component system, OmpR family, sensor histidine kinase QseC [EC:2.7.13.3]	15	0
K10260	FBXW7, SEL10; F-box and WD-40 domain protein 7	15	0
K19045	BB; E3 ubiquitin-protein ligase BIG BROTHER and related proteins [EC:2.3.2.27]	15	0
K22525	MKL; MKL/myocardin-like protein	15	0
K24887	GTPBP1; GTP-binding protein 1	15	0
K01807	rpiA; ribose 5-phosphate isomerase A [EC:5.3.1.6]	14	0
K04759	feoB; ferrous iron transport protein B	14	0
K05795	terD; tellurium resistance protein TerD	14	0
K12071	traD; conjugal transfer pilus assembly protein TraD	14	0
K12217	icmO, trbC, dotL; intracellular multiplication protein IcmO [EC:7.2.4.8]	14	0
K18758	DIS3L2; DIS3-like exonuclease 2 [EC:3.1.13.-]	14	0
K19236	ycfS; L,D-transpeptidase YcfS	14	0
K20157	mppO; enduracididine beta-hydroxylase [EC:1.14.11.40]	14	0
K24483	FANK1; fibronectin type 3 and ankyrin repeat domains	14	0
K03528	zipA; cell division protein ZipA	13	0
K03759	adiC; arginine:agmatine antiporter	13	0
K10676	tfdB; 2,4-dichlorophenol 6-monooxygenase [EC:1.14.13.20]	13	0
K11595	CHP1; chromo domain-containing protein 1	13	0
K11985	TRAIP, TRIP; TRAF-interacting protein [EC:2.3.2.27]	13	0
K12435	pks8; polyketide synthase 8	13	0
K16786	ecfA1; energy-coupling factor transport system ATP-binding protein [EC:7.-.-.-]	13	0
K16787	ecfA2; energy-coupling factor transport system ATP-binding protein [EC:7.-.-.-]	13	0
K20875	NEK6; serine/threonine-protein kinase Nek6 [EC:2.7.11.34]	13	0
K02992	RP-S7, MRPS7, rpsG; small subunit ribosomal protein S7	12	0
K10053	RUNX1T1, CBFA2T1; CBFA2/RNUX1 translocation partner 1	12	0
K12163	ZFAND4, ANUBL1; AN1-type zinc finger protein 4	12	0
K14016	UFD1; ubiquitin fusion degradation protein 1	12	0
K22657	IGDCC4, NOPE; immunoglobulin superfamily DCC subclass	12	0
K00683	QPCT; glutaminyl-peptide cyclotransferase [EC:2.3.2.5]	11	0
K01076	ABHD17; abhydrolase domain-containing protein 17 [EC:3.1.2.22]	11	0
K01900	LSC2; succinyl-CoA synthetase beta subunit [EC:6.2.1.4 6.2.1.5]	11	0
K02107	ATPVG, ahaH, atpH; V/A-type H+/Na+-transporting ATPase subunit G/H	11	0
K03500	rsmB, sun; 16S rRNA (cytosine967-C5)-methyltransferase [EC:2.1.1.176]	11	0
K06323	cgeE; spore maturation protein CgeE	11	0
K07082	mltG; peptidoglycan lytic transglycosylase G [EC:4.2.2.29]	11	0
K07259	dacB; serine-type D-Ala-D-Ala carboxypeptidase/endopeptidase (penicillin-binding protein 4) [EC:3.4.16.4 3.4.21.-]	11	0
K08051	PLEKHA8, FAPP2; pleckstrin homology domain containing family A member 8	11	0
K09490	HSPA5, BIP; endoplasmic reticulum chaperone BiP [EC:3.6.4.10]	11	0
K09701	K09701; uncharacterized protein	11	0
K13814	TSNARE1; t-SNARE domain-containing protein 1	11	0
K19372	DNAJC27; DnaJ homolog subfamily C member 27	11	0
K22244	REG4; regenerating islet-derived protein 4	11	0
K22757	QCT, qpcT; glutaminyl-peptide cyclotransferase	11	0
K25422	yceF; 7-methyl-GTP pyrophosphatase	11	0
K00914	PIK3C3, VPS34; phosphatidylinositol 3-kinase [EC:2.7.1.137]	10	0
K01376	UFSP2; Ufm1-specific protease 2 [EC:3.4.22.-]	10	0
K02439	glpE; thiosulfate sulfurtransferase [EC:2.8.1.1]	10	0
K03316	nhaP, nhaS1, nhaS2; Na+:H+ antiporter	10	0
K03578	hrpA; ATP-dependent helicase HrpA [EC:3.6.4.13]	10	0
K03600	sspB; stringent starvation protein B	10	0
K03809	wrbA; NAD(P)H dehydrogenase (quinone) [EC:1.6.5.2]	10	0
K04712	DEGS; sphingolipid 4-desaturase/C4-monooxygenase [EC:1.14.19.17 1.14.18.5]	10	0
K06175	truC; tRNA pseudouridine65 synthase [EC:5.4.99.26]	10	0
K06210	NMNAT; nicotinamide mononucleotide adenylyltransferase [EC:2.7.7.1 2.7.7.18]	10	0
K06374	spmB; spore maturation protein B	10	0
K07514	EHHADH; enoyl-CoA hydratase / 3-hydroxyacyl-CoA dehydrogenase / 3,2-trans-enoyl-CoA isomerase [EC:4.2.1.17 1.1.1.35 5.3.3.8]	10	0
K07888	RAB5B; Ras-related protein Rab-5B	10	0
K10980	NHEJ1, XLF; non-homologous end-joining factor 1	10	0
K11021	tccC; insecticidal toxin complex protein TccC	10	0
K11967	ANKIB1; ankyrin repeat and IBR domain-containing protein 1 [EC:2.3.2.31]	10	0
K13459	RPS2; disease resistance protein RPS2	10	0
K15539	rodZ; cytoskeleton protein RodZ	10	0
K15984	rsmJ; 16S rRNA (guanine1516-N2)-methyltransferase [EC:2.1.1.242]	10	0
K18491	ESX1; homeobox protein ESX1	10	0
K19615	fitD, mcf; insecticidal toxin	10	0
K19919	CRISP1_2_3; cysteine-rich secretory protein 1/2/3	10	0
K20876	NEK7; serine/threonine-protein kinase Nek7 [EC:2.7.11.34]	10	0
K21415	ANKS6; ankyrin repeat and SAM domain-containing protein 6	10	0
K23528	pnpB; p-benzoquinone reductase (NADPH)	10	0
K24868	nirJ; heme d1 biosynthesis protein	10	0
K00025	MDH1; malate dehydrogenase [EC:1.1.1.37]	9	0
K00242	sdhD, frdD; succinate dehydrogenase membrane anchor subunit	9	0
K01125	NAGPA; N-acetylglucosamine-1-phosphodiester alpha-N-acetylglucosaminidase [EC:3.1.4.45]	9	0
K02066	mlaE, linK; phospholipid/cholesterol/gamma-HCH transport system permease protein	9	0
K02213	CDC6; cell division control protein 6	9	0
K02280	cpaC, rcpA; pilus assembly protein CpaC	9	0
K02383	flbB; flagellar protein FlbB	9	0
K02948	RP-S11, MRPS11, rpsK; small subunit ribosomal protein S11	9	0
K02955	RP-S14e, RPS14; small subunit ribosomal protein S14e	9	0
K03170	topG, rgy; reverse gyrase [EC:5.6.2.2 5.6.2.-]	9	0
K03507	DPB11; DNA replication regulator DPB11	9	0
K03631	recN; DNA repair protein RecN (Recombination protein N)	9	0
K07220	K07220; uncharacterized protein	9	0
K07689	uvrY, gacA, varA; two-component system, NarL family, invasion response regulator UvrY	9	0
K07696	nreC; two-component system, NarL family, response regulator NreC	9	0
K09806	ubiK; ubiquinone biosynthesis accessory factor UbiK	9	0
K10822	E7.4.2.2; nonpolar-amino-acid-transporting ATPase [EC:7.4.2.2]	9	0
K11022	rtxA1, rtxA; structural toxin protein (hemagglutinin/hemolysin) RtxA	9	0
K12214	icmL, traM, dotI; intracellular multiplication protein IcmL	9	0
K12957	ahr; alcohol/geraniol dehydrogenase (NADP+) [EC:1.1.1.2 1.1.1.183]	9	0
K13894	yejB; microcin C transport system permease protein	9	0
K13979	yahK; alcohol dehydrogenase (NADP+) [EC:1.1.1.2]	9	0
K21600	csoR, ricR; CsoR family transcriptional regulator, cop	9	0
K24437	TSEAR; thrombospondin-type laminin G domain and EAR repeat	9	0
K01798	alr-murF; Alr-MurF fusion protein [EC:5.1.1.1 6.3.2.10]	8	0
K03055	rpoK; DNA-directed RNA polymerase subunit K [EC:2.7.7.6]	8	0
K03288	citA, tcuC; MFS transporter, MHS family, citrate/tricarballylate:H+ symporter	8	0
K03522	fixB, etfA; electron transfer flavoprotein alpha subunit	8	0
K03762	proP; MFS transporter, MHS family, proline/betaine transporter	8	0
K05020	opuD, betL; glycine betaine transporter	8	0
K05540	dusB; tRNA-dihydrouridine synthase B [EC:1.-.-.-]	8	0
K05881	dhaM; phosphoenolpyruvate---glycerone phosphotransferase subunit DhaM [EC:2.7.1.121]	8	0
K06186	bamE, smpA; outer membrane protein assembly factor BamE	8	0
K08960	CSNK1E; casein kinase 1, epsilon [EC:2.7.11.1]	8	0
K09823	zur; Fur family transcriptional regulator, zinc uptake regulator	8	0
K09861	K09861; uncharacterized protein	8	0
K10160	TLR4, CD284; toll-like receptor 4	8	0
K11609	kasA; meromycolic acid 3-oxoacyl-(acyl carrier protein) synthase I [EC:2.3.1.293]	8	0
K14082	mtbA; [methyl-Co(III) methylamine-specific corrinoid protein]:coenzyme M methyltransferase [EC:2.1.1.247]	8	0
K16274	AIP2; E3 ubiquitin-protein ligase AIP2 [EC:2.3.2.27]	8	0
K17722	preT; dihydropyrimidine dehydrogenase (NAD+) subunit PreT [EC:1.3.1.1]	8	0
K18809	TL; protein toll	8	0
K24224	CFAP44, WDR52; cilia- and flagella-associated protein 44	8	0
K00002	AKR1A1, adh; alcohol dehydrogenase (NADP+) [EC:1.1.1.2]	7	0
K00783	rlmH; 23S rRNA (pseudouridine1915-N3)-methyltransferase [EC:2.1.1.177]	7	0
K01279	TPP1, CLN2; tripeptidyl-peptidase I [EC:3.4.14.9]	7	0
K02164	norE; nitric oxide reductase NorE protein	7	0
K02262	COX3; cytochrome c oxidase subunit 3	7	0
K02299	cyoC; cytochrome o ubiquinol oxidase subunit III	7	0
K02495	hemN, hemZ; oxygen-independent coproporphyrinogen III oxidase [EC:1.3.98.3]	7	0
K02860	rimM; 16S rRNA processing protein RimM	7	0
K03308	TC.NSS; neurotransmitter:Na+ symporter, NSS family	7	0
K03610	minC; septum site-determining protein MinC	7	0
K04334	csgA; major curlin subunit	7	0
K05166	IL17RC, IL17RL; interleukin 17 receptor C	7	0
K05363	murM; serine/alanine adding enzyme [EC:2.3.2.10]	7	0
K05717	FN1; fibronectin 1	7	0
K06169	miaE; tRNA 2-(methylsulfanyl)-N6-isopentenyladenosine37 hydroxylase [EC:1.14.99.69]	7	0
K06373	spmA; spore maturation protein A	7	0
K07019	K07019; uncharacterized protein	7	0
K07246	ttuC, dmlA; tartrate dehydrogenase/decarboxylase / D-malate dehydrogenase [EC:1.1.1.93 4.1.1.73 1.1.1.83]	7	0
K07397	yhfA; putative redox protein	7	0
K08075	E3.1.3.32; polynucleotide 3'-phosphatase [EC:3.1.3.32]	7	0
K10357	MYO5; myosin V	7	0
K10641	LRSAM1; E3 ubiquitin-protein ligase LRSAM1 [EC:2.3.2.27]	7	0
K13288	orn, REX2, REXO2; oligoribonuclease [EC:3.1.-.-]	7	0
K13996	EPS1; protein disulfide-isomerase [EC:5.3.4.1]	7	0
K15015	SLC32A, VGAT; solute carrier family 32 (vesicular inhibitory amino acid transporter)	7	0
K16602	TTLL5; tubulin polyglutamylase TTLL5 [EC:6.3.2.61]	7	0
K18097	GCY1; glycerol 2-dehydrogenase (NADP+) [EC:1.1.1.156]	7	0
K18416	THEX1, ERI1; 3'-5' exoribonuclease 1 [EC:3.1.-.-]	7	0
K19634	gar1; D-galacturonate reductase [EC:1.1.1.365]	7	0
K24068	MEGF10_11; multiple epidermal growth factor-like domains protein 10/11	7	0
K01077	E3.1.3.1, phoA, phoB; alkaline phosphatase [EC:3.1.3.1]	6	0
K01776	murI; glutamate racemase [EC:5.1.1.3]	6	0
K01867	WARS, trpS; tryptophanyl-tRNA synthetase [EC:6.1.1.2]	6	0
K02238	comEC; competence protein ComEC	6	0
K02590	nifHD2, nifI2; nitrogen regulatory protein PII 2	6	0
K03535	gudP; MFS transporter, ACS family, glucarate transporter	6	0
K03579	hrpB; ATP-dependent helicase HrpB [EC:3.6.4.13]	6	0
K04512	DAAM; dishevelled associated activator of morphogenesis	6	0
K04608	GRM6; metabotropic glutamate receptor 6	6	0
K04612	CASR; calcium-sensing receptor	6	0
K04752	glnK; nitrogen regulatory protein P-II 2	6	0
K05750	NCKAP1, NAP125; NCK-associated protein 1	6	0
K07027	K07027; glycosyltransferase 2 family protein	6	0
K07749	frc; formyl-CoA transferase [EC:2.8.3.16]	6	0
K08104	HS3ST5; [heparan sulfate]-glucosamine 3-sulfotransferase 5 [EC:2.8.2.23]	6	0
K09858	K09858; SEC-C motif domain protein	6	0
K10900	WRN, RECQL2; werner syndrome ATP-dependent helicase [EC:5.6.2.4]	6	0
K11268	ESCO, ECO1; N-acetyltransferase [EC:2.3.1.-]	6	0
K12046	TNNT3; troponin T, fast skeletal muscle	6	0
K12204	dotC, traI; defect in organelle trafficking protein DotC	6	0
K12213	icmK, traN, dotH; intracellular multiplication protein IcmK	6	0
K12350	SMPD1, ASM; sphingomyelin phosphodiesterase [EC:3.1.4.12]	6	0
K12562	AMPH; amphiphysin	6	0
K13283	fieF; ferrous-iron efflux pump FieF	6	0
K15488	lubX; E3 ubiquitin-protein ligase LubX	6	0
K15631	ABA3; molybdenum cofactor sulfurtransferase [EC:2.8.1.9]	6	0
K16347	ecnA; entericidin A	6	0
K16503	CDHR3, CDH28; cadherin-related family member 3	6	0
K16743	ASPM, ASP; abnormal spindle-like microcephaly-associated protein	6	0
K18889	mdlA, smdA; ATP-binding cassette, subfamily B, multidrug efflux pump	6	0
K18890	mdlB, smdB; ATP-binding cassette, subfamily B, multidrug efflux pump	6	0
K20305	TRAPPC8, TRS85; trafficking protein particle complex subunit 8	6	0
K20728	VSP2; vegetative storage protein 2	6	0
K21013	FPPP; farnesyl diphosphate phosphatase [EC:3.1.3.-]	6	0
K22292	mupP; N-acetyl-D-muramate 6-phosphate phosphatase	6	0
K26208	E2.7.1.239; alpha-D-ribose-1-phosphate 5-kinase (ATP)	6	0
K00500	phhA, PAH; phenylalanine-4-hydroxylase [EC:1.14.16.1]	5	0
K00501	TH; tyrosine 3-monooxygenase [EC:1.14.16.2]	5	0
K00601	E2.1.2.2; phosphoribosylglycinamide formyltransferase [EC:2.1.2.2]	5	0
K01053	gnl, RGN; gluconolactonase [EC:3.1.1.17]	5	0
K01568	PDC, pdc; pyruvate decarboxylase [EC:4.1.1.1]	5	0
K02191	cbiT; cobalt-precorrin-6B (C15)-methyltransferase [EC:2.1.1.196]	5	0
K03011	RPB3, POLR2C; DNA-directed RNA polymerase II subunit RPB3	5	0
K03609	minD; septum site-determining protein MinD	5	0
K03834	tyrP; tyrosine-specific transport protein	5	0
K03921	FAB2, SSI2, desA1; acyl-[acyl-carrier-protein] desaturase [EC:1.14.19.2 1.14.19.11 1.14.19.26]	5	0
K03991	MBL; mannose-binding lectin	5	0
K04441	P38; p38 MAP kinase [EC:2.7.11.24]	5	0
K04551	UBB; ubiquitin B	5	0
K04554	UBE2J2, NCUBE2, UBC6; ubiquitin-conjugating enzyme E2 J2 [EC:2.3.2.23]	5	0
K05589	ftsB; cell division protein FtsB	5	0
K06927	DPH6; diphthine-ammonia ligase [EC:6.3.1.14]	5	0
K07460	yraN; putative endonuclease	5	0
K09003	K09003; uncharacterized protein	5	0
K09058	TEF; thyrotrophic embryonic factor	5	0
K09644	LPA; apolipoprotein(a) [EC:3.4.21.-]	5	0
K09938	K09938; uncharacterized protein	5	0
K10596	UBE4A; ubiquitin conjugation factor E4 A [EC:2.3.2.27]	5	0
K10780	fabL; enoyl-[acyl-carrier protein] reductase III [EC:1.3.1.104]	5	0
K11806	DCAF13, WDSOF1; DDB1- and CUL4-associated factor 13	5	0
K12205	dotD, traH; defect in organelle trafficking protein DotD	5	0
K12219	icmQ; intracellular multiplication protein IcmQ	5	0
K13171	SRRM1, SRM160; serine/arginine repetitive matrix protein 1	5	0
K13938	folM; dihydromonapterin reductase / dihydrofolate reductase [EC:1.5.1.50 1.5.1.3]	5	0
K15685	CBLL1; E3 ubiquitin-protein ligase Hakai [EC:2.3.2.27]	5	0
K17609	NXN; nucleoredoxin [EC:1.8.1.8]	5	0
K18408	TDRD9; ATP-dependent RNA helicase TDRD9 [EC:3.6.4.13]	5	0
K19108	tabA; decarboxylase [EC:4.1.1.-]	5	0
K19307	BMT5; 25S rRNA (uracil2634-N3)-methyltransferase [EC:2.1.1.313]	5	0
K20087	vioB; violacein biosynthesis protein VioB	5	0
K20796	PRDM7_9; [histone H3]-lysine4 N-trimethyltransferase PRDM7/9 [EC:2.1.1.354]	5	0
K22808	KANK; KN motif and ankyrin repeat domain-containing protein	5	0
K22850	cfaA; CFA/I fimbrial subunit A	5	0
K24513	ITIH3, SHAP; inter-alpha-trypsin inhibitor heavy chain H3	5	0
K00414	QCR1, UQCRC1; ubiquinol-cytochrome c reductase core subunit 1	4	0
K01129	dgt; dGTPase [EC:3.1.5.1]	4	0
K01137	GNS; N-acetylglucosamine-6-sulfatase [EC:3.1.6.14]	4	0
K01426	E3.5.1.4, amiE; amidase [EC:3.5.1.4]	4	0
K01474	hyuB; N-methylhydantoinase B [EC:3.5.2.14]	4	0
K02068	STAR1, fetA; UDP-glucose/iron transport system ATP-binding protein	4	0
K02580	NFKB1; nuclear factor NF-kappa-B p105 subunit	4	0
K02836	prfB; peptide chain release factor 2	4	0
K02837	prfC; peptide chain release factor 3	4	0
K03165	TOP3; DNA topoisomerase III [EC:5.6.2.1]	4	0
K03175	TRAF6; TNF receptor-associated factor 6 [EC:2.3.2.27]	4	0
K04367	MOS; proto-oncogene serine/threonine-protein kinase mos [EC:2.7.11.1]	4	0
K04445	RPS6KA5, MSK1; ribosomal protein S6 kinase alpha-5 [EC:2.7.11.1]	4	0
K04794	PTH2, PTRH2; peptidyl-tRNA hydrolase, PTH2 family [EC:3.1.1.29]	4	0
K06955	NA	4	0
K07121	K07121; uncharacterized protein	4	0
K07282	capA, pgsA; gamma-polyglutamate biosynthesis protein CapA	4	0
K07407	E3.2.1.22B, galA, rafA; alpha-galactosidase [EC:3.2.1.22]	4	0
K07782	sdiA; LuxR family transcriptional regulator, quorum-sensing system regulator SdiA	4	0
K08106	CHST15; N-acetylgalactosamine 4-sulfate 6-O-sulfotransferase [EC:2.8.2.33]	4	0
K08850	AURKX; aurora kinase, other [EC:2.7.11.1]	4	0
K09531	DNAJC11; DnaJ homolog subfamily C member 11	4	0
K09791	K09791; uncharacterized protein	4	0
K10663	ATL4; E3 ubiquitin-protein ligase ATL4 [EC:2.3.2.27]	4	0
K10907	K10907; aminotransferase [EC:2.6.1.-]	4	0
K11153	RDH12; retinol dehydrogenase 12 [EC:1.1.1.300]	4	0
K11592	DICER1, DCR1; endoribonuclease Dicer [EC:3.1.26.-]	4	0
K11854	USP35_38; ubiquitin carboxyl-terminal hydrolase 35/38 [EC:3.4.19.12]	4	0
K12207	icmC, dotE; intracellular multiplication protein IcmC	4	0
K13023	CPN2; carboxypeptidase N regulatory subunit	4	0
K15022	fdhB; formate dehydrogenase (NADP+) beta subunit [EC:1.17.1.10]	4	0
K15261	PARP10_14_15; poly [ADP-ribose] polymerase 10/14/15 [EC:2.4.2.30]	4	0
K15475	lpnE; enhanced entry protein LpnE	4	0
K15486	legK1; serine/threonine-protein kinase LegK1 [EC:2.7.1.-]	4	0
K15924	xynC; glucuronoarabinoxylan endo-1,4-beta-xylanase [EC:3.2.1.136]	4	0
K16873	hmfH; 5-(hydroxymethyl)furfural/furfural oxidase [EC:1.1.3.47 1.1.3.-]	4	0
K17299	POTE; POTE ankyrin domain family protein	4	0
K17593	ANKRD42, SARP; ankyrin repeat domain-containing protein 42	4	0
K18563	thnL; methyltransferase [EC:2.1.1.-]	4	0
K19013	STAB2, HARE; stabilin-2	4	0
K19020	STAB1; stabilin-1	4	0
K20756	E3.4.21.103; physarolisin [EC:3.4.21.103]	4	0
K22352	blaOXA-29; beta-lactamase class D OXA-29	4	0
K23997	nnr; ADP-dependent NAD(P)H-hydrate dehydratase / NAD(P)H-hydrate epimerase	4	0
K25462	OPRPN, SMR3, PROL1; opiorphin prepropeptide and related proteins	4	0
K00598	tam; trans-aconitate 2-methyltransferase [EC:2.1.1.144]	3	0
K00653	CDY; chromodomain protein Y [EC:2.3.1.48]	3	0
K00739	B3GNT6; acetylgalactosaminyl-O-glycosyl-glycoprotein beta-1,3-N-acetylglucosaminyltransferase [EC:2.4.1.147]	3	0
K00887	dgkA; undecaprenol kinase [EC:2.7.1.66]	3	0
K00901	dgkA, DGK; diacylglycerol kinase (ATP) [EC:2.7.1.107]	3	0
K01403	MMP9; matrix metalloproteinase-9 (gelatinase B) [EC:3.4.24.35]	3	0
K01408	IDE, ide; insulysin [EC:3.4.24.56]	3	0
K01524	ppx-gppA; exopolyphosphatase / guanosine-5'-triphosphate,3'-diphosphate pyrophosphatase [EC:3.6.1.11 3.6.1.40]	3	0
K01634	SGPL1, DPL1; sphinganine-1-phosphate aldolase [EC:4.1.2.27]	3	0
K03210	yajC; preprotein translocase subunit YajC	3	0
K03428	bchM, chlM; magnesium-protoporphyrin O-methyltransferase [EC:2.1.1.11]	3	0
K03801	lipB; lipoyl(octanoyl) transferase [EC:2.3.1.181]	3	0
K04103	ipdC; indolepyruvate decarboxylase [EC:4.1.1.74]	3	0
K04110	badA; benzoate-CoA ligase [EC:6.2.1.25]	3	0
K04498	EP300, CREBBP, KAT3; E1A/CREB-binding protein [EC:2.3.1.48]	3	0
K05480	EDA; ectodysplasin-A	3	0
K05529	MNN9; mannan polymerase complexes MNN9 subunit [EC:2.4.1.232]	3	0
K05533	ANP1; mannan polymerase II complex ANP1 subunit [EC:2.4.1.-]	3	0
K06128	LYPLA1; lysophospholipase I [EC:3.1.1.5]	3	0
K06494	SELE, CD62E; selectin, endothelial cell	3	0
K06495	SELL, CD62L; selectin, lymphocyte	3	0
K06496	SELP, CD62P; selectin, platelet	3	0
K06994	K06994; putative drug exporter of the RND superfamily	3	0
K07579	K07579; putative methylase	3	0
K07589	folX; D-erythro-7,8-dihydroneopterin triphosphate epimerase [EC:5.1.99.7]	3	0
K07712	glnG, ntrC; two-component system, NtrC family, nitrogen regulation response regulator GlnG	3	0
K08191	exuT; MFS transporter, ACS family, aldohexuronate transporter	3	0
K08285	TRIM18, MID1; midline 1 [EC:2.3.2.27]	3	0
K08351	bisC; biotin/methionine sulfoxide reductase [EC:1.-.-.-]	3	0
K09057	HLF; hepatic leukemia factor	3	0
K09220	IKZF, ZNFN1A; IKAROS family zinc finger protein	3	0
K10229	smoG, mtlG; polyol transport system permease protein	3	0
K10259	MET30; F-box and WD-40 domain protein MET30	3	0
K10280	FBXL14; F-box and leucine-rich repeat protein 14	3	0
K10359	MYO7A, USH1B; myosin VIIa	3	0
K11209	yghU, yfcG; GSH-dependent disulfide-bond oxidoreductase [EC:1.8.4.-]	3	0
K11651	SMARCE1; SWI/SNF-related matrix-associated actin-dependent regulator of chromatin subfamily E member 1	3	0
K12224	icmW; intracellular multiplication protein IcmW	3	0
K14444	SLC13A1_4; solute carrier family 13 (sodium/sulfate cotransporter), member 1/4	3	0
K14445	SLC13A2_3_5; solute carrier family 13 (sodium-dependent dicarboxylate transporter), member 2/3/5	3	0
K14775	UTP30, RSL1D1; ribosome biogenesis protein UTP30	3	0
K14963	WDR5, SWD3, CPS30; COMPASS component SWD3	3	0
K15123	SLC25A45_47; solute carrier family 25, member 45/47	3	0
K15695	RNF103, KF1; E3 ubiquitin-protein ligase RNF103 [EC:2.3.2.27]	3	0
K16599	TTLL1; tubulin polyglutamylase TTLL1 [EC:6.3.2.61]	3	0
K16843	slcC; (S)-sulfolactate dehydrogenase [EC:1.1.1.310]	3	0
K17302	COPB2, SEC27; coatomer subunit beta'	3	0
K17457	PPP1R12C, MBS85; protein phosphatase 1 regulatory subunit 12C	3	0
K18753	ZFP36L; butyrate response factor	3	0
K19055	prdX, proX; Ala-tRNA(Pro) deacylase [EC:3.1.1.-]	3	0
K19893	GN5_6; glucan endo-1,3-beta-glucosidase 5/6 [EC:3.2.1.39]	3	0
K20704	ECT2, ARHGEF31; protein ECT2	3	0
K21514	aviRb; 23S rRNA (uridine2479-2'-O)-methyltransferase	3	0
K21564	nnrR; CRP/FNR family transcriptional regulator, nitrogen oxide reductase regulator	3	0
K23095	MENG, menG; demethylphylloquinol methyltransferase	3	0
K24121	MPO1; 2-hydroxy fatty acid dioxygenase	3	0
K24148	RNF151; RING finger protein 151	3	0
K24932	CFAP70, TTC18; cilia- and flagella-associated protein 70	3	0
K00006	GPD1; glycerol-3-phosphate dehydrogenase (NAD+) [EC:1.1.1.8]	2	0
K00111	glpA, glpD; glycerol-3-phosphate dehydrogenase [EC:1.1.5.3]	2	0
K00326	CYB5R; cytochrome-b5 reductase [EC:1.6.2.2]	2	0
K00368	nirK; nitrite reductase (NO-forming) [EC:1.7.2.1]	2	0
K00415	QCR2, UQCRC2; ubiquinol-cytochrome c reductase core subunit 2	2	0
K00671	NMT; glycylpeptide N-tetradecanoyltransferase [EC:2.3.1.97]	2	0
K00798	MMAB, pduO; cob(I)alamin adenosyltransferase [EC:2.5.1.17]	2	0
K00804	GGPS1; geranylgeranyl diphosphate synthase, type III [EC:2.5.1.1 2.5.1.10 2.5.1.29]	2	0
K00813	aspC; aspartate aminotransferase [EC:2.6.1.1]	2	0
K00846	KHK; ketohexokinase [EC:2.7.1.3]	2	0
K00854	xylB, XYLB; xylulokinase [EC:2.7.1.17]	2	0
K00907	MYLK; myosin-light-chain kinase [EC:2.7.11.18]	2	0
K00982	glnE; [glutamine synthetase] adenylyltransferase / [glutamine synthetase]-adenylyl-L-tyrosine phosphorylase [EC:2.7.7.42 2.7.7.89]	2	0
K01012	bioB; biotin synthase [EC:2.8.1.6]	2	0
K01086	fbp-SEBP; fructose-1,6-bisphosphatase I / sedoheptulose-1,7-bisphosphatase [EC:3.1.3.11 3.1.3.37]	2	0
K01128	SMPDL3; sphingomyelin phosphodiesterase acid-like 3 [EC:3.1.4.-]	2	0
K01198	xynB; xylan 1,4-beta-xylosidase [EC:3.2.1.37]	2	0
K01233	csn; chitosanase [EC:3.2.1.132]	2	0
K01256	pepN; aminopeptidase N [EC:3.4.11.2]	2	0
K01307	GGH; gamma-glutamyl hydrolase [EC:3.4.19.9]	2	0
K01337	E3.4.21.50; lysyl endopeptidase [EC:3.4.21.50]	2	0
K01404	GP63; leishmanolysin [EC:3.4.24.36]	2	0
K01433	purU; formyltetrahydrofolate deformylase [EC:3.5.1.10]	2	0
K01528	DNM1_3; dynamin 1/3 [EC:3.6.5.5]	2	0
K01533	copB; P-type Cu2+ transporter [EC:7.2.2.9]	2	0
K01534	zntA; Zn2+/Cd2+-exporting ATPase [EC:7.2.2.12 7.2.2.21]	2	0
K01580	E4.1.1.15, gadB, gadA, GAD; glutamate decarboxylase [EC:4.1.1.15]	2	0
K01597	MVD, mvaD; diphosphomevalonate decarboxylase [EC:4.1.1.33]	2	0
K01692	paaF, echA; enoyl-CoA hydratase [EC:4.2.1.17]	2	0
K01706	gudD; glucarate dehydratase [EC:4.2.1.40]	2	0
K01823	idi, IDI; isopentenyl-diphosphate Delta-isomerase [EC:5.3.3.2]	2	0
K01847	MUT; methylmalonyl-CoA mutase [EC:5.4.99.2]	2	0
K01856	catB; muconate cycloisomerase [EC:5.5.1.1]	2	0
K01958	PC, pyc; pyruvate carboxylase [EC:6.4.1.1]	2	0
K02005	ABC.CD.TX; HlyD family secretion protein	2	0
K02065	mlaF, linL, mkl; phospholipid/cholesterol/gamma-HCH transport system ATP-binding protein	2	0
K02073	metQ; D-methionine transport system substrate-binding protein	2	0
K02192	bfd; bacterioferritin-associated ferredoxin	2	0
K02350	REV3L, POLZ; DNA polymerase zeta [EC:2.7.7.7]	2	0
K02359	EGH; beta-1,4-mannosyltransferase [EC:2.4.1.-]	2	0
K02429	fucP; MFS transporter, FHS family, L-fucose permease	2	0
K02689	psaA; photosystem I P700 chlorophyll a apoprotein A1 [EC:1.97.1.12]	2	0
K02823	pyrDII; dihydroorotate dehydrogenase electron transfer subunit	2	0
K02927	RP-L40e, RPL40, UBA52; ubiquitin-large subunit ribosomal protein L40e	2	0
K02999	RPA1, POLR1A; DNA-directed RNA polymerase I subunit RPA1 [EC:2.7.7.6]	2	0
K03047	rpoD; DNA-directed RNA polymerase subunit D [EC:2.7.7.6]	2	0
K03053	rpoH; DNA-directed RNA polymerase subunit H [EC:2.7.7.6]	2	0
K03130	TAF5; transcription initiation factor TFIID subunit 5	2	0
K03254	EIF3A; translation initiation factor 3 subunit A	2	0
K03259	EIF4E; translation initiation factor 4E	2	0
K03666	hfq; host factor-I protein	2	0
K03724	lhr; ATP-dependent helicase Lhr and Lhr-like helicase [EC:3.6.4.13 5.6.2.4]	2	0
K03886	qcrA; quinol---cytochrome c reductase iron-sulfur subunit, bacillus type [EC:7.1.1.8]	2	0
K03933	cpbD; chitin-binding protein	2	0
K04090	E1.2.7.8; indolepyruvate ferredoxin oxidoreductase [EC:1.2.7.8]	2	0
K04230	GALR1; galanin receptor 1	2	0
K04890	KCNC4, KV3.4; potassium voltage-gated channel Shaw-related subfamily C member 4	2	0
K05143	TNFRSF6B, DCR3; tumor necrosis factor receptor superfamily member 6B	2	0
K05156	RELT, TNFRSF19L; tumor necrosis factor receptor superfamily member 19-like	2	0
K05522	nei; endonuclease VIII [EC:3.2.2.- 4.2.99.18]	2	0
K05748	WASF2; WAS protein family, member 2	2	0
K05872	NFKBIE; NF-kappa-B inhibitor epsilon	2	0
K05991	E3.2.1.123; endoglycosylceramidase [EC:3.2.1.123]	2	0
K06413	spoVK; stage V sporulation protein K	2	0
K06558	MSR1, CD204; macrophage scavenger receptor 1	2	0
K06622	CDKN2C, P18, INK4C; cyclin-dependent kinase inhibitor 2C	2	0
K06836	ADAM15; disintegrin and metalloproteinase domain-containing protein 15 [EC:3.4.24.-]	2	0
K06880	ereA_B; erythromycin esterase [EC:3.1.1.-]	2	0
K06896	mapP; maltose 6'-phosphate phosphatase [EC:3.1.3.90]	2	0
K07167	chrR; putative transcriptional regulator	2	0
K07203	MTOR, FRAP, TOR; serine/threonine-protein kinase mTOR [EC:2.7.11.1]	2	0
K07577	K07577; putative mRNA 3-end processing factor	2	0
K07686	uhpA; two-component system, NarL family, uhpT operon response regulator UhpA	2	0
K07816	E2.7.6.5; GTP pyrophosphokinase [EC:2.7.6.5]	2	0
K07824	CYP53A1; benzoate 4-monooxygenase [EC:1.14.14.92]	2	0
K07827	KRAS, KRAS2; GTPase KRas	2	0
K08428	GPR139; G protein-coupled receptor 139	2	0
K08568	CTSZ; cathepsin X [EC:3.4.18.1]	2	0
K08851	TP53RK, PRPK, BUD32; TP53 regulating kinase and related kinases [EC:2.7.11.1]	2	0
K08974	K08974; putative membrane protein	2	0
K09214	GL; glass	2	0
K09512	DNAJB6; DnaJ homolog subfamily B member 6	2	0
K09577	FKBP14; FK506-binding protein 14 [EC:5.2.1.8]	2	0
K10119	msmG; raffinose/stachyose/melibiose transport system permease protein	2	0
K10130	LRDD, PIDD; leucine-rich repeats and death domain-containing protein	2	0
K10137	ZMAT3; zinc finger, matrin type 3	2	0
K10233	aglF, ggtC; alpha-glucoside transport system permease protein	2	0
K10238	thuG, sugB; trehalose/maltose transport system permease protein	2	0
K10256	FAD2; omega-6 fatty acid desaturase / acyl-lipid omega-6 desaturase (Delta-12 desaturase) [EC:1.14.19.6 1.14.19.22]	2	0
K10297	FBXO11; F-box protein 11	2	0
K10330	ASB8; ankyrin repeat and SOCS box protein 8	2	0
K10331	ASB9; ankyrin repeat and SOCS box protein 9	2	0
K10353	E2.7.1.76, dak; deoxyadenosine kinase [EC:2.7.1.76]	2	0
K10400	KIF15; kinesin family member 15	2	0
K10638	UHRF1, NP95; E3 ubiquitin-protein ligase UHRF1 [EC:2.3.2.27]	2	0
K10647	TRIM1, MID2; midline 2 [EC:2.3.2.27]	2	0
K10667	RNF8; E3 ubiquitin-protein ligase RNF8 [EC:2.3.2.27]	2	0
K10691	UBR4, ZUBR1; E3 ubiquitin-protein ligase UBR4 [EC:2.3.2.27]	2	0
K10737	MCM8; DNA helicase MCM8 [EC:5.6.2.4]	2	0
K11160	DGAT2; diacylglycerol O-acyltransferase 2 [EC:2.3.1.20 2.3.1.75]	2	0
K11276	NPM1; nucleophosmin 1	2	0
K11294	NCL, NSR1; nucleolin	2	0
K11366	USP22_27_51, UBP8; ubiquitin carboxyl-terminal hydrolase 22/27/51 [EC:3.4.19.12]	2	0
K11427	DOT1L, DOT1; [histone H3]-lysine79 N-trimethyltransferase [EC:2.1.1.360]	2	0
K11907	vasG, clpV; type VI secretion system protein VasG	2	0
K11981	RNF41, NRDP1; E3 ubiquitin-protein ligase NRDP1 [EC:2.3.2.27]	2	0
K12221	icmS; intracellular multiplication protein IcmS	2	0
K12231	HECTD1; E3 ubiquitin-protein ligase HECTD1 [EC:2.3.2.26]	2	0
K12849	PRPF38A; pre-mRNA-splicing factor 38A	2	0
K12864	CTNNBL1; beta-catenin-like protein 1	2	0
K12954	ctpG; cation-transporting P-type ATPase G [EC:7.2.2.-]	2	0
K12974	lpxP; KDO2-lipid IV(A) palmitoleoyltransferase [EC:2.3.1.242]	2	0
K13238	ECI1, DCI; Delta3-Delta2-enoyl-CoA isomerase [EC:5.3.3.8]	2	0
K13378	nuoCD; NADH-quinone oxidoreductase subunit C/D [EC:7.1.1.2]	2	0
K13403	MTHFD2; methylenetetrahydrofolate dehydrogenase(NAD+) / 5,10-methenyltetrahydrofolate cyclohydrolase [EC:1.5.1.15 3.5.4.9]	2	0
K13412	CPK; calcium-dependent protein kinase [EC:2.7.11.1]	2	0
K13658	gumI; beta-1,4-mannosyltransferase [EC:2.4.1.251]	2	0
K13690	CMT1; alpha-1,3-mannosyltransferase [EC:2.4.1.-]	2	0
K13693	gpgS; glucosyl-3-phosphoglycerate synthase [EC:2.4.1.266]	2	0
K14054	mpaA; murein peptide amidase A	2	0
K14261	alaC; alanine-synthesizing transaminase [EC:2.6.1.-]	2	0
K14267	dapC; N-succinyldiaminopimelate aminotransferase [EC:2.6.1.17]	2	0
K14454	GOT1; aspartate aminotransferase, cytoplasmic [EC:2.6.1.1]	2	0
K14457	MOGAT2, MGAT2; 2-acylglycerol O-acyltransferase 2 [EC:2.3.1.22]	2	0
K14458	MOGAT1, MGAT1; 2-acylglycerol O-acyltransferase 1 [EC:2.3.1.22]	2	0
K14555	UTP13, TBL3; U3 small nucleolar RNA-associated protein 13	2	0
K14766	NOP14, UTP2; nucleolar protein 14	2	0
K14983	ciaR; two-component system, OmpR family, response regulator CiaR	2	0
K15001	CYP4; cytochrome P450 family 4 [EC:1.14.-.-]	2	0
K15013	ACSBG; long-chain-fatty-acid--CoA ligase ACSBG [EC:6.2.1.3]	2	0
K15113	SLC25A28_37, MFRN; solute carrier family 25 (mitochondrial iron transporter), member 28/37	2	0
K15159	MED16; mediator of RNA polymerase II transcription subunit 16	2	0
K15341	DCLRE1B, SNM1B; DNA cross-link repair 1B protein [EC:3.1.-.-]	2	0
K15353	sspH2; E3 ubiquitin-protein ligase SspH2	2	0
K15712	TTC3; E3 ubiquitin-protein ligase TTC3 [EC:2.3.2.27]	2	0
K16089	TC.FEV.OM2, cirA, cfrA, hmuR; outer membrane receptor for ferrienterochelin and colicins	2	0
K16135	dmlR; LysR family transcriptional regulator, transcriptional activator for dmlA	2	0
K16180	pylB; methylornithine synthase [EC:5.4.99.58]	2	0
K16920	ytrE; acetoin utilization transport system ATP-binding protein	2	0
K17506	PPM1L, PP2CE; protein phosphatase 1L [EC:3.1.3.16]	2	0
K17550	PPP1R7, SDS22; protein phosphatase 1 regulatory subunit 7	2	0
K17584	PCIF1; phosphorylated CTD-interacting factor 1	2	0
K17908	WIPI1_2, ATG18; autophagy-related protein 18	2	0
K18293	cymAb; p-cymene methyl-monooxygenase electron transfer component [EC:1.18.1.3]	2	0
K18681	DIS3L; DIS3-like exonuclease 1 [EC:3.1.13.-]	2	0
K18685	ACOS; ophiobolin F synthase [EC:4.2.3.145]	2	0
K18715	NUP159; nucleoporin NUP159	2	0
K18875	EDS1; enhanced disease susceptibility 1 protein	2	0
K19039	ATL7_58_59; E3 ubiquitin-protein ligase ATL7/58/59 [EC:2.3.2.27]	2	0
K19360	NPHP3; nephrocystin-3	2	0
K19612	PDE12; 2',5'-phosphodiesterase [EC:3.1.13.4 3.1.4.-]	2	0
K20454	dml; 2,3-dimethylmalate lyase [EC:4.1.3.32]	2	0
K21197	PCL5, pas1; PHO85 cyclin-5	2	0
K21343	USP15; ubiquitin carboxyl-terminal hydrolase 15 [EC:3.4.19.12]	2	0
K21358	ULK3; serine/threonine-protein kinase ULK3 [EC:2.7.11.1]	2	0
K21392	AEBP1; adipocyte enhancer-binding protein 1	2	0
K21501	UL9; Alphaherpesvirinae replication origin-binding protein	2	0
K21704	FAH12; phosphatidylcholine 12-monooxygenase	2	0
K21710	FAC; linoleoyl-lipid Delta12 conjugase (11E,13Z-forming)	2	0
K21734	SLD; sphingolipid 8-(E/Z)-desaturase	2	0
K21736	FADX; Delta12 acyl-lipid conjugase (11E,13E-forming) / acyl-lipid (9+3)-(E)-desaturase	2	0
K22544	SAMHD1; deoxynucleoside triphosphate triphosphohydrolase SAMHD1	2	0
K22815	Oct-TyrR; octopamine/tyramine receptor	2	0
K23060	artR, artM; arginine/lysine/histidine transport system ATP-binding protein	2	0
K23150	E3.5.1.129; N5-(cytidine 5'-diphosphoramidyl)-L-glutamine hydrolase	2	0
K23341	ERLIN; erlin	2	0
K23481	VPS1; vacuolar protein sorting-associated protein 1	2	0
K23518	MACROD, ymdB; O-acetyl-ADP-ribose deacetylase	2	0
K23874	cmlD, papB; 4-amino-4-deoxychorismate mutase	2	0
K24120	ahpE; mycoredoxin-dependent peroxiredoxin	2	0
K24489	FSD1; fibronectin type III and SPRY domain-containing protein 1	2	0
K24633	ANKMY2, ZMYND20, DAF25; ankyrin repeat and MYND domain-containing protein 2	2	0
K24719	sph1; smc-like protein Sph1	2	0
K24745	WDR38; WD repeat-containing protein 38	2	0
K25026	glk; glucokinase	2	0
K25031	gntK; gluconokinase	2	0
K25166	EEF1AKNMT, METTL13; eEF1A lysine and N-terminal methyltransferase	2	0
K25443	DRC3; dynein regulatory complex subunit 3	2	0
K25620	gtlB; lipoteichoic acid galactosyltransferase	2	0
K26077	ISE2, EMB25; ATP-dependent RNA helicase ISE2	2	0
K02451	gspB; general secretion pathway protein B	0	62
K07268	oapA; opacity associated protein	0	62
K20732	GPNMB; transmembrane glycoprotein NMB	0	33
K09800	tamB; translocation and assembly module TamB	0	17
K18909	mepR; MarR family transcriptional regulator, repressor for mepA	0	15
K11165	DHRS7; dehydrogenase/reductase SDR family member 7 [EC:1.1.-.-]	0	14
K18916	ptxD; phosphonate dehydrogenase [EC:1.20.1.1]	0	12
K23834	ipaH7.8; E3 ubiquitin-protein ligase IpaH7.8	0	12
K18852	HPA3; D-amino-acid N-acetyltransferase [EC:2.3.1.36]	0	11
K23775	ohrR; MarR family transcriptional regulator, organic hydroperoxide resistance regulator	0	11
K11214	SHPK; sedoheptulokinase [EC:2.7.1.14]	0	10
K17810	asl; D-aspartate ligase [EC:6.3.1.12]	0	10
K19147	mcrC; 5-methylcytosine-specific restriction enzyme subunit McrC	0	10
K19354	waaH; heptose III glucuronosyltransferase [EC:2.4.1.-]	0	10
K22477	argO; N-acetylglutamate synthase	0	10
K23197	wbbA; O7-antigen biosynthesis N-acetylviosaminyltransferase	0	10
K04784	irp2, HMWP2; yersiniabactin nonribosomal peptide synthetase	0	9
K00508	E1.14.19.3; linoleoyl-CoA desaturase [EC:1.14.19.3]	0	8
K01303	APEH; acylaminoacyl-peptidase [EC:3.4.19.1]	0	8
K11071	potB; spermidine/putrescine transport system permease protein	0	8
K14171	AHP1; alkyl hydroperoxide reductase 1 [EC:1.11.1.24]	0	8
K03885	ndh; NADH:quinone reductase (non-electrogenic) [EC:1.6.5.9]	0	7
K04076	lonB; ATP-dependent Lon protease [EC:3.4.21.53]	0	7
K13280	SEC11, sipW; signal peptidase I [EC:3.4.21.89]	0	7
K15050	EXOG; nuclease EXOG, mitochondrial	0	7
K22769	desA3; NADPH-dependent stearoyl-CoA 9-desaturase	0	7
K01432	AFMID; arylformamidase [EC:3.5.1.9]	0	6
K06141	tsgA; MFS transporter, TsgA protein	0	6
K07213	ATOX1, ATX1, copZ, golB; copper chaperone	0	6
K11257	FUT11; galactoside 3-L-fucosyltransferase 11 [EC:2.4.1.-]	0	6
K12515	tadG; tight adherence protein G	0	6
K21169	calE2; enediyne biosynthesis protein CalE2	0	6
K00219	fadH; 2,4-dienoyl-CoA reductase (NADPH2) [EC:1.3.1.34]	0	5
K00712	tagE; poly(glycerol-phosphate) alpha-glucosyltransferase [EC:2.4.1.52]	0	5
K00895	pfp, PFP; diphosphate-dependent phosphofructokinase [EC:2.7.1.90]	0	5
K05553	actI3, oxyC, tcmM, snoa3, aknD, mtmS; minimal PKS acyl carrier protein	0	5
K07560	dtd, DTD; D-aminoacyl-tRNA deacylase [EC:3.1.1.96]	0	5
K10797	enr; 2-enoate reductase [EC:1.3.1.31]	0	5
K11399	EAF7; chromatin modification-related protein EAF7	0	5
K11438	PRMT7; type III protein arginine methyltransferase [EC:2.1.1.321]	0	5
K13285	sipB, ipaB, bipB; invasin B	0	5
K13547	btrR, neoB, kanB; L-glutamine:2-deoxy-scyllo-inosose/3-amino-2,3-dideoxy-scyllo-inosose aminotransferase [EC:2.6.1.100 2.6.1.101]	0	5
K17999	hydC; iron-hydrogenase subunit gamma [EC:1.12.1.4]	0	5
K18399	BPHL; valacyclovir hydrolase [EC:3.1.-.-]	0	5
K22137	MCUR1; mitochondrial calcium uniporter regulator 1	0	5
K22570	AF480; 5-dehydro-6-demethoxyfumagillol dioxygenase	0	5
K01381	PEP4; saccharopepsin [EC:3.4.23.25]	0	4
K02277	coxD, ctaF; cytochrome c oxidase subunit IV [EC:7.1.1.9]	0	4
K02879	RP-L17, MRPL17, rplQ; large subunit ribosomal protein L17	0	4
K03518	coxS; aerobic carbon-monoxide dehydrogenase small subunit [EC:1.2.5.3]	0	4
K05060	IL6ST, GP130, CD130; interleukin 6 signal transducer	0	4
K06222	dkgB; 2,5-diketo-D-gluconate reductase B [EC:1.1.1.346]	0	4
K06563	CLEC4L_M, DC-SIGN, CD209, CD299; C-type lectin domain family 4 member L/M	0	4
K09607	ina; immune inhibitor A [EC:3.4.24.-]	0	4
K10841	ERCC6, CSB, RAD26; DNA excision repair protein ERCC-6	0	4
K11780	cofG; 7,8-didemethyl-8-hydroxy-5-deazariboflavin synthase [EC:4.3.1.32]	0	4
K17064	ddh; D-2-hydroxyacid dehydrogenase (NADP+) [EC:1.1.1.272]	0	4
K17223	soxX; L-cysteine S-thiosulfotransferase [EC:2.8.5.2]	0	4
K17816	NUDT1, MTH1; 8-oxo-dGTP diphosphatase / 2-hydroxy-dATP diphosphatase [EC:3.6.1.55 3.6.1.56]	0	4
K19668	CBH2, cbhA; cellulose 1,4-beta-cellobiosidase [EC:3.2.1.91]	0	4
K23257	yvgN; methylglyoxal/glyoxal reductase	0	4
K00019	BDH1, bdhA; 3-hydroxybutyrate dehydrogenase [EC:1.1.1.30]	0	3
K00850	pfkA, PFK; 6-phosphofructokinase 1 [EC:2.7.1.11]	0	3
K01563	dhaA; haloalkane dehalogenase [EC:3.8.1.5]	0	3
K01607	pcaC; 4-carboxymuconolactone decarboxylase [EC:4.1.1.44]	0	3
K02584	nifA; Nif-specific regulatory protein	0	3
K03333	choD; cholesterol oxidase [EC:1.1.3.6]	0	3
K03606	wcaJ; undecaprenyl-phosphate glucose phosphotransferase [EC:2.7.8.31]	0	3
K05711	hcaB; 2,3-dihydroxy-2,3-dihydrophenylpropionate dehydrogenase [EC:1.3.1.87]	0	3
K06019	ppaX; pyrophosphatase PpaX [EC:3.6.1.1]	0	3
K06900	capV; cGAMP-activated phospholipase [EC:3.1.1.32 3.1.1.-]	0	3
K07406	melA; alpha-galactosidase [EC:3.2.1.22]	0	3
K08632	ADAMTS18; a disintegrin and metalloproteinase with thrombospondin motifs 18 [EC:3.4.24.-]	0	3
K11527	K11527; two-component system, sensor histidine kinase and response regulator [EC:2.7.13.3]	0	3
K11719	lptC; lipopolysaccharide export system protein LptC	0	3
K12146	hyfR; hydrogenase-4 transcriptional activator	0	3
K14286	AGXT2L1, ETNPPL; ethanolamine-phosphate phospho-lyase [EC:4.2.3.2]	0	3
K14582	nahB, doxE; cis-1,2-dihydro-1,2-dihydroxynaphthalene/dibenzothiophene dihydrodiol dehydrogenase [EC:1.3.1.29 1.3.1.60]	0	3
K14727	pcaL; 3-oxoadipate enol-lactonase / 4-carboxymuconolactone decarboxylase [EC:3.1.1.24 4.1.1.44]	0	3
K14787	MRD1, RBM19; multiple RNA-binding domain-containing protein 1	0	3
K15226	tyrAa; arogenate dehydrogenase (NADP+) [EC:1.3.1.78]	0	3
K15633	gpmI; 2,3-bisphosphoglycerate-independent phosphoglycerate mutase [EC:5.4.2.12]	0	3
K15837	GPSM2; G-protein signaling modulator 2	0	3
K16017	rifM, asm45; AHBA synthesis associated protein	0	3
K17315	gtsA, glcE; glucose/mannose transport system substrate-binding protein	0	3
K18846	npmA; 16S rRNA (adenine(1408)-N(1))-methyltransferase [EC:2.1.1.180]	0	3
K19311	lipV; lipase [EC:3.1.1.-]	0	3
K20997	pslA; polysaccharide biosynthesis protein PslA	0	3
K21084	yegE; diguanylate cyclase [EC:2.7.7.65]	0	3
K21503	56; Straboviridae dCTP pyrophosphatase	0	3
K22135	bshB2; N-acetylglucosamine malate deacetylase 2	0	3
K22298	smtB; ArsR family transcriptional regulator, zinc-responsive transcriptional repressor	0	3
K25755	LECT2; leukocyte cell-derived chemotaxin-2	0	3
K00175	korB, oorB, oforB; 2-oxoglutarate/2-oxoacid ferredoxin oxidoreductase subunit beta [EC:1.2.7.3 1.2.7.11]	0	2
K00187	vorB; 2-oxoisovalerate ferredoxin oxidoreductase beta subunit [EC:1.2.7.7]	0	2
K00483	hpaB; 4-hydroxyphenylacetate 3-monooxygenase [EC:1.14.14.9]	0	2
K00784	rnz; ribonuclease Z [EC:3.1.26.11]	0	2
K00954	E2.7.7.3A, coaD, kdtB; pantetheine-phosphate adenylyltransferase [EC:2.7.7.3]	0	2
K01062	PLA2G7, PAFAH; platelet-activating factor acetylhydrolase [EC:3.1.1.47]	0	2
K01208	cd, ma, nplT; cyclomaltodextrinase / maltogenic alpha-amylase / neopullulanase [EC:3.2.1.54 3.2.1.133 3.2.1.135]	0	2
K01769	E4.6.1.2; guanylate cyclase, other [EC:4.6.1.2]	0	2
K01968	MCCC1, accA1; 3-methylcrotonyl-CoA carboxylase alpha subunit [EC:6.4.1.4]	0	2
K02237	comEA; competence protein ComEA	0	2
K02317	dnaT; DNA replication protein DnaT	0	2
K02440	glpF; glycerol uptake facilitator	0	2
K02594	nifV; homocitrate synthase NifV [EC:2.3.3.14]	0	2
K02716	psbO; photosystem II oxygen-evolving enhancer protein 1	0	2
K02798	cmtB; mannitol PTS system EIIA component [EC:2.7.1.197]	0	2
K03056	rpoL; DNA-directed RNA polymerase subunit L [EC:2.7.7.6]	0	2
K03179	ubiA; 4-hydroxybenzoate polyprenyltransferase [EC:2.5.1.39]	0	2
K03420	psmR; proteasome regulatory subunit	0	2
K03739	dltB; membrane protein involved in D-alanine export	0	2
K03973	pspC; phage shock protein C	0	2
K04073	mhpF; acetaldehyde dehydrogenase [EC:1.2.1.10]	0	2
K04974	TRPV5; transient receptor potential cation channel subfamily V member 5	0	2
K04975	TRPV6; transient receptor potential cation channel subfamily V member 6	0	2
K06125	COQ2; 4-hydroxybenzoate polyprenyltransferase [EC:2.5.1.39]	0	2
K06221	dkgA; 2,5-diketo-D-gluconate reductase A [EC:1.1.1.346]	0	2
K07012	cas3; CRISPR-associated endonuclease/helicase Cas3 [EC:3.1.-.- 5.6.2.4]	0	2
K07119	PTGR3, ZADH2; prostaglandin reductase 3 [EC:1.3.1.48]	0	2
K07139	K07139; uncharacterized protein	0	2
K07140	K07140; MOSC domain-containing protein	0	2
K07182	K07182; CBS domain-containing protein	0	2
K07488	K07488; transposase	0	2
K07684	narL; two-component system, NarL family, nitrate/nitrite response regulator NarL	0	2
K08994	yneE, BEST; ion channel-forming bestrophin family protein	0	2
K09722	K09722, pps; 4-phosphopantoate---beta-alanine ligase [EC:6.3.2.36]	0	2
K09772	sepF; cell division inhibitor SepF	0	2
K09874	NIP; aquaporin NIP	0	2
K10283	FBXL17; F-box and leucine-rich repeat protein 17	0	2
K11075	potH, spuG; putrescine transport system permease protein	0	2
K11923	cueR; MerR family transcriptional regulator, copper efflux regulator	0	2
K12256	spuC; putrescine---pyruvate transaminase [EC:2.6.1.113]	0	2
K12960	mtaD; 5-methylthioadenosine/S-adenosylhomocysteine deaminase [EC:3.5.4.31 3.5.4.28]	0	2
K13587	cckA; two-component system, cell cycle sensor histidine kinase and response regulator CckA [EC:2.7.13.3]	0	2
K13774	atuB; citronellol/citronellal dehydrogenase	0	2
K16639	LACTB2; endoribonuclease LACTB2 [EC:3.1.27.-]	0	2
K17218	sqr; sulfide:quinone oxidoreductase [EC:1.8.5.4]	0	2
K17229	fccB; sulfide dehydrogenase [flavocytochrome c] flavoprotein chain [EC:1.8.2.3]	0	2
K18365	bphI, xylK, nahM, tesG; 4-hydroxy-2-oxovalerate/4-hydroxy-2-oxohexanoate aldolase [EC:4.1.3.39 4.1.3.43]	0	2
K18366	bphJ, xylQ, nahO, tesF; acetaldehyde/propanal dehydrogenase [EC:1.2.1.10 1.2.1.87]	0	2
K18578	CEL74A; xyloglucan-specific exo-beta-1,4-glucanase [EC:3.2.1.155]	0	2
K18665	NUDT8; nudix motif 8 [EC:3.6.1.-]	0	2
K18694	PGC1; phosphatidylglycerol phospholipase C [EC:3.1.4.-]	0	2
K18914	FDXR; adrenodoxin-NADP+ reductase [EC:1.18.1.6]	0	2
K19116	cas5h; CRISPR-associated protein Cas5h	0	2
K19118	csd2, cas7; CRISPR-associated protein Csd2	0	2
K19119	cas5d; CRISPR-associated protein Cas5d	0	2
K19333	kdgR; IclR family transcriptional regulator, KDG regulon repressor	0	2
K19563	bioA, bioK; lysine---8-amino-7-oxononanoate aminotransferase [EC:2.6.1.105]	0	2
K20851	agaA; alpha-agarase [EC:3.2.1.158]	0	2
K21125	NA	0	2
K21511	C; Enterobacteria phage capsid assembly protease	0	2
K21949	sbnA; N-(2-amino-2-carboxyethyl)-L-glutamate synthase	0	2
K22185	xylB; D-xylose 1-dehydrogenase	0	2
K22470	SQOR; eukaryotic sulfide quinone oxidoreductase	0	2
K22710	tarM; poly(ribitol-phosphate) alpha-N-acetylglucosaminyltransferase	0	2
K23351	gcdC, mmdC; glutaconyl-CoA/methylmalonyl-CoA decarboxylase subunit gamma	0	2
K24459	SLFN13; schlafen family member 13	0	2
K24936	TTC28; tetratricopeptide repeat protein 28	0	2
K26051	SPATA5L1; ribosome biogenesis protein SPATA5L1	0	2
