# Supplementary material for: Distinct horizontal gene transfer potential of extracellular vesicles versus viral-like particles in marine habitats
Source: Research Square preprint supplement (doi:10.21203/rs.3.rs-4633115/v1), 2024-07-18
Supplement: Supplementary file 2 [file c8a09d7f4a2aa9292284de67.xlsx]

## Sheet: Sheet1
Supplementary Table 1. Viral taxonomy classification provided by geNomad of nanoparticle reads. All reads included had a viral score >0.9 and >1 viral hallmark gene, or were classified as medium or high quality by CheckV.
	Realm	Kingdom	Phylum	Class	Order	Family	Count (EV-enriched)	Count (VLP-enriched)
Viruses	Duplodnaviria	Heunggongvirae	NA	NA	NA	NA	2	13
Viruses	Duplodnaviria	Heunggongvirae	Peploviricota	Herviviricetes	Herpesvirales	NA	1	5
Viruses	Duplodnaviria	Heunggongvirae	Peploviricota	Herviviricetes	Herpesvirales	Herpesviridae	0	2
Viruses	Duplodnaviria	Heunggongvirae	Uroviricota	Caudoviricetes	NA	NA	762288	487100
Viruses	Duplodnaviria	Heunggongvirae	Uroviricota	Caudoviricetes	Ackermannviridae	NA	21	7
Viruses	Duplodnaviria	Heunggongvirae	Uroviricota	Caudoviricetes	Autographiviridae	NA	11678	24873
Viruses	Duplodnaviria	Heunggongvirae	Uroviricota	Caudoviricetes	Crassvirales	NA	2366	8788
Viruses	Duplodnaviria	Heunggongvirae	Uroviricota	Caudoviricetes	Demerecviridae	NA	2132	140
Viruses	Duplodnaviria	Heunggongvirae	Uroviricota	Caudoviricetes	Drexlerviridae	NA	18	0
Viruses	Duplodnaviria	Heunggongvirae	Uroviricota	Caudoviricetes	Herelleviridae	NA	94	23
Viruses	Duplodnaviria	Heunggongvirae	Uroviricota	Caudoviricetes	Kyanoviridae	NA	1534	3166
Viruses	Duplodnaviria	Heunggongvirae	Uroviricota	Caudoviricetes	Mesyanzhinovviridae	NA	4	0
Viruses	Duplodnaviria	Heunggongvirae	Uroviricota	Caudoviricetes	Schitoviridae	NA	4	6
Viruses	Duplodnaviria	Heunggongvirae	Uroviricota	Caudoviricetes	Straboviridae	NA	148	8
Viruses	Duplodnaviria	Heunggongvirae	Uroviricota	Caudoviricetes	Thumleimavirales	NA	2	8
Viruses	Duplodnaviria	Heunggongvirae	Uroviricota	Caudoviricetes	Thumleimavirales	Hafunaviridae	0	12
Viruses	Duplodnaviria	Heunggongvirae	Uroviricota	Caudoviricetes	Zobellviridae	NA	16	10
Viruses	Monodnaviria	Sangervirae	Phixviricota	Malgrandaviricetes	Petitvirales	NA	1	0
Viruses	Varidnaviria	Bamfordvirae	NA	NA	NA	NA	26	5
Viruses	Varidnaviria	Bamfordvirae	Nucleocytoviricota	NA	NA	NA	73	3
Viruses	Varidnaviria	Bamfordvirae	Nucleocytoviricota	Megaviricetes	NA	NA	114	39
Viruses	Varidnaviria	Bamfordvirae	Nucleocytoviricota	Megaviricetes	Algavirales	NA	37	3
Viruses	Varidnaviria	Bamfordvirae	Nucleocytoviricota	Megaviricetes	Algavirales	Phycodnaviridae	54	6
Viruses	Varidnaviria	Bamfordvirae	Nucleocytoviricota	Megaviricetes	Imitervirales	NA	60	5
Viruses	Varidnaviria	Bamfordvirae	Nucleocytoviricota	Megaviricetes	Imitervirales	Mimiviridae	49	10
Viruses	Varidnaviria	Bamfordvirae	Nucleocytoviricota	Megaviricetes	Pimascovirales	NA	10	0
Viruses	Varidnaviria	Bamfordvirae	Nucleocytoviricota	Megaviricetes	Pimascovirales	Iridoviridae	27	1
Viruses	Varidnaviria	Bamfordvirae	Preplasmiviricota	NA	NA	NA	9	0
Viruses	Varidnaviria	Bamfordvirae	Preplasmiviricota	Maveriviricetes	Priklausovirales	NA	3	2
Viruses	Varidnaviria	Bamfordvirae	Preplasmiviricota	Maveriviricetes	Priklausovirales	Lavidaviridae	3	1
Viruses	Varidnaviria	Bamfordvirae	Preplasmiviricota	Polintoviricetes	Orthopolintovirales	NA	5	1
Viruses	Varidnaviria	Bamfordvirae	Preplasmiviricota	Polintoviricetes	Orthopolintovirales	Adintoviridae	9	0
Unclassified	NA	NA	NA	NA	NA	NA	7601	3426
